# Supplementary material for: Axial–equatorial equilibrium in substituted cyclohexanes: a DFT perspective on a small but complex problem
Source: Royal Society of Chemistry journal article supplement (doi:10.1039/d3cp06141h), 2024-01-01
Supplement: d3cp06141h1.pdf [file d3cp06141h1.pdf]

**Axial-equatorial equilibrium in substituted cyclohexanes: a DFT  
perspective on a small but complex problem**

Hanwei Li<sup>a</sup>, Eric Brémond<sup>b</sup>, Juan Carlos Sancho-García<sup>c</sup>, Ángel José Pérez-Jiménez<sup>c</sup>,  
Giovanni Scalmani<sup>d</sup>, Michael J. Frisch<sup>d</sup>, and Carlo Adamo<sup>a\*</sup>

*<sup>a</sup>Chimie ParisTech, PSL Research University, CNRS, Institute of Chemistry for Health  
and Life Sciences, F-75005 Paris, France ; <sup>b</sup>Université Paris Cité, ITODYS, CNRS, F-  
75006 Paris, France; <sup>c</sup>Departamento de Química Física, Universidad de Alicante, E-  
03080 Alicante, Spain; <sup>d</sup>Gaussian, Inc.; Wallingford, CT 06492, USA*

**Supporting Information**

Table S1. D4 parameters for PBE-QIDH functionals, derived from a fitting to reference data set, namely S66x8 [1], S22x5 [2] and NCIBLIND10 [3] sets

|          | s6    | s8    | a <sub>1</sub> | a <sub>2</sub> |
|----------|-------|-------|----------------|----------------|
| PBE-QIDH | 0.610 | 0.665 | 0.402          | 5.941          |

1)B. Brauer, M. K. Kesharwani, S. Kozuch and J. M. L. Martin, , *Phys. Chem. Chem. Phys.*, 2016, 18, 20905–20925.

2)L. Gráfová, M. Pitoňák, J. Řezáč and P. Hobza, , *J. Chem. Theory Comput.*, 2010, 6, 2365–2376.

3)D. E. Taylor, J. G. Ángyán, G. Galli, C. Zhang, F. Gygi, K. Hirao, J. W. Song, K. Rahul, O. Anatole Von Lilienfeld, R. Podeszwa, I. W. Bulik, T. M. Henderson, G. E. Scuseria, J. Toulouse, R. Peverati, D. G. Truhlar and K. Szalewicz, *The Journal of Chemical Physics*, 2016, 145, 124105.

**Table S2.** Energy differences (kcal/mol) between the axial and equatorial conformers, computed at the CCSD(T) level, with different basis sets and extrapolation schemes. Mean Absolute Errors are computed with respect to the CCSD(T)-CBS(3,4) data.

| R     | d $\zeta$ | t $\zeta$ | q $\zeta$ | CBS 2/3 <sup>a</sup> | CBS 3/4 <sup>a</sup> | CBS 2/3 | CBS 3/4 |
|-------|-----------|-----------|-----------|----------------------|----------------------|---------|---------|
| F     | -0.377    | -0.004    | 0.106     | 0.120                | 0.13                 | 0.104   | 0.134   |
| Cl    | 0.355     | 0.383     | 0.401     | 0.356                | 0.378                | 0.274   | 0.382   |
| Br    | 0.508     | 0.453     | 0.41      | 0.39                 | 0.367                | 0.29    | 0.369   |
| I     | 0.824     | 0.492     | 0.319     | 0.327                | 0.173                | 0.215   | 0.178   |
| CCH   | -0.02     | 0.181     | 0.248     | 0.246                | 0.277                | 0.234   | 0.278   |
| CN    | -0.225    | -0.098    | -0.049    | -0.061               | -0.031               | -0.079  | -0.03   |
| Me    | 1.844     | 1.725     | 1.758     | 1.665                | 1.781                | 1.625   | 1.78    |
| Et-A  | 1.691     | 1.597     | 1.628     | 1.549                | 1.648                | 1.515   | 1.648   |
| Et-B  | 0.892     | 0.791     | 0.806     | 0.746                | 0.816                | 0.725   | 0.816   |
| iPr-A | 1.409     | 1.298     | 1.348     | 1.243                | 1.381                | 1.207   | 1.38    |
| iPr-B | 1.485     | 1.302     | 1.334     | 1.226                | 1.356                | 1.197   | 1.356   |
| tBu   | 5.100     | 4.829     | 4.845     | 4.710                | 4.851                | 4.654   | 4.851   |
| Ph-B  | 2.922     | 2.694     | 2.700     | 2.588                | 2.697                | 2.53    | 2.697   |
| Ph-C  | 3.98      | 3.988     | 4.033     | 3.977                | 4.052                | 3.946   | 4.053   |
| Ph-D  | 3.149     | 2.931     | 2.971     | 2.823                | 2.988                | 2.75    | 2.988   |
| CF3   | 1.602     | 2.226     | 2.27      | 2.434                | 2.264                | 2.412   | 2.267   |
| CCl3  | 5.051     | 4.93      | 4.845     | 4.855                | 4.765                | 4.784   | 4.769   |
| CBr3  | 5.93      | 5.661     | 5.549     | 5.523                | 5.451                | 5.423   | 5.454   |
| CI3   | 7.164     | 6.824     | 6.508     | 6.662                | 6.259                | 6.564   | 6.266   |
| SiMe3 | 2.209     | 2.226     | 2.263     | 2.219                | 2.275                | 2.19    | 2.276   |
| MAE   | 0.26      | 0.107     | 0.043     | 0.145                | 0.002                | 0.117   | 0.000   |

a) Original Helgaker scheme

**Table S3.** Energy differences (kcal/mol) between the axial and equatorial conformers, computed at the DLPNO-CCSD(T) level, with different basis sets and extrapolation schemes. Mean Absolute Errors are computed with respect to the CCSD(T)-CBS(3,4) data.

|                   | d $\zeta$ | t $\zeta$ | q $\zeta$ | CBS 2/3 | CBS 3/4 | EP3   |
|-------------------|-----------|-----------|-----------|---------|---------|-------|
| F                 | -0.358    | -0.02     | 0.082     | 0.067   | 0.105   | 0.104 |
| Cl                | 0.374     | 0.393     | 0.39      | 0.279   | 0.357   | 0.322 |
| Br                | 0.558     | 0.473     | 0.402     | 0.292   | 0.342   | 0.259 |
| I                 | 0.569     | 0.538     | 0.343     | 0.437   | 0.187   | 0.206 |
| CCH               | 0.013     | 0.182     | 0.263     | 0.216   | 0.302   | 0.241 |
| CN                | -0.206    | -0.082    | -0.053    | -0.065  | -0.048  | -0.11 |
| Me                | 1.87      | 1.736     | 1.758     | 1.627   | 1.773   | 1.699 |
| Et-A              | 1.741     | 1.604     | 1.636     | 1.496   | 1.657   | 1.553 |
| Et-B              | 0.918     | 0.783     | 0.79      | 0.697   | 0.793   | 0.71  |
| iPr-A             | 1.467     | 1.347     | 1.391     | 1.251   | 1.418   | 1.345 |
| iPr-B             | 1.531     | 1.339     | 1.374     | 1.229   | 1.398   | 1.341 |
| tBu               | 5.132     | 4.865     | 4.875     | 4.692   | 4.878   | 4.794 |
| Ph-B              | 3.002     | 2.767     | 2.773     | 2.599   | 2.77    | 2.628 |
| Ph-C              | 4.046     | 4.013     | 4.052     | 3.947   | 4.066   | 4.095 |
| Ph-D              | 3.233     | 3.028     | 3.034     | 2.855   | 3.027   | 2.922 |
| CF <sub>3</sub>   | 1.691     | 2.269     | 2.285     | 2.429   | 2.262   | 2.034 |
| CCl <sub>3</sub>  | 5.112     | 4.991     | 4.849     | 4.845   | 4.732   | 4.663 |
| CBr <sub>3</sub>  | 6.022     | 5.695     | 5.563     | 5.422   | 5.455   | 5.336 |
| CI <sub>3</sub>   | 6.949     | 6.84      | 6.484     | 6.715   | 6.214   | 6.18  |
| SiMe <sub>3</sub> | 2.271     | 2.27      | 2.288     | 2.223   | 2.288   | 2.221 |
| MAE               | 0.254     | 0.107     | 0.048     | 0.128   | 0.003   | 0.076 |

**Table S4.** Energy differences (kcal/mol) between the axial and equatorial conformers, computed at the SCS-MP2 level, with different basis sets and extrapolation schemes. Mean Absolute Errors are computed with respect to the CCSD(T)-CBS(3,4) data.

|       | d $\zeta$ | t $\zeta$ | q $\zeta$ | CBS 2/3 | CBS 3/4 |
|-------|-----------|-----------|-----------|---------|---------|
| F     | -0.38     | -0.005    | 0.114     | 0.09    | 0.15    |
| Cl    | 0.418     | 0.455     | 0.481     | 0.37    | 0.469   |
| Br    | 0.615     | 0.562     | 0.533     | 0.42    | 0.494   |
| I     | 0.992     | 0.687     | 0.507     | 0.444   | 0.36    |
| CCH   | -0.075    | 0.074     | 0.138     | 0.087   | 0.161   |
| CN    | -0.232    | -0.15     | -0.106    | -0.16   | -0.097  |
| Me    | 1.888     | 1.798     | 1.824     | 1.739   | 1.837   |
| Et-A  | 1.739     | 1.681     | 1.705     | 1.635   | 1.714   |
| Et-B  | 0.913     | 0.839     | 0.851     | 0.795   | 0.856   |
| iPr-A | 1.44      | 1.368     | 1.412     | 1.307   | 1.435   |
| iPr-B | 1.55      | 1.409     | 1.432     | 1.329   | 1.443   |
| tBu   | 5.22      | 5.036     | 5.042     | 4.935   | 5.039   |
| Ph-B  | 3.106     | 2.905     | 2.905     | 2.732   | 2.893   |
| Ph-C  | 4.142     | 4.157     | 4.185     | 4.121   | 4.192   |
| Ph-D  | 3.344     | 3.153     | 3.183     | 2.97    | 3.189   |
| CF3   | 1.769     | 2.411     | 2.468     | 2.605   | 2.469   |
| CCl3  | 5.192     | 5.086     | 5.005     | 4.973   | 4.932   |
| CBr3  | 6.082     | 5.826     | 5.709     | 5.624   | 5.61    |
| CI3   | 7.334     | 6.977     | 6.652     | 6.745   | 6.404   |
| SiMe3 | 2.397     | 2.463     | 2.5       | 2.457   | 2.509   |
| MAE   | 0.334     | 0.189     | 0.155     | 0.122   | 0.126   |

**Table S5.** Energy differences (kcal/mol) between the axial and equatorial conformers, computed using the selected functionals the Def2-TZVPP basis set. Mean Absolute Errors are computed with respect to the CCSD(T)-CBS(3,4) data.

| R     | B3LYP | B3LYPD3 | B2PLYP | B2PLYP-D3 | M11   | M11-D3BJ | MN15  | DSDPBEP86 |
|-------|-------|---------|--------|-----------|-------|----------|-------|-----------|
| F     | 0.29  | 0.13    | 0.19   | 0.10      | -0.43 | -0.44    | -0.04 | 0.15      |
| Cl    | 0.98  | 0.37    | 0.69   | 0.34      | -0.43 | -0.46    | -0.15 | 0.28      |
| Br    | 1.24  | 0.46    | 0.86   | 0.40      | -0.50 | -0.55    | -0.17 | 0.28      |
| I     | 1.43  | 0.59    | 0.98   | 0.49      | -0.46 | -0.56    | -0.19 | 0.26      |
| CCH   | 1.15  | 0.70    | 0.68   | 0.43      | -0.41 | -0.47    | -0.24 | 0.09      |
| CN    | 0.81  | 0.38    | 0.37   | 0.16      | -0.66 | -0.70    | -0.53 | -0.17     |
| Me    | 2.34  | 1.88    | 2.08   | 1.85      | 1.12  | 1.10     | 1.45  | 1.72      |
| Et-A  | 2.44  | 1.80    | 2.06   | 1.73      | 0.90  | 0.86     | 1.20  | 1.57      |
| Et-B  | 1.29  | 0.96    | 1.06   | 0.88      | 0.42  | 0.39     | 0.59  | 0.78      |
| iPr-A | 2.46  | 1.59    | 1.93   | 1.48      | 0.55  | 0.48     | 0.79  | 1.28      |
| iPr-B | 2.35  | 1.76    | 1.87   | 1.56      | 0.83  | 0.78     | 1.03  | 1.32      |
| tBu   | 5.70  | 4.90    | 5.36   | 4.93      | 4.39  | 4.31     | 4.58  | 4.84      |
| Ph-B  | 4.35  | 3.37    | 3.61   | 3.09      | 1.69  | 1.54     | 2.15  | 2.65      |
| Ph-C  | 4.61  | 3.95    | 4.36   | 4.03      | 4.12  | 4.01     | 4.47  | 3.96      |
| Ph-D  | 4.85  | 3.70    | 4.00   | 3.38      | 1.83  | 1.67     | 2.30  | 2.89      |
| CF3   | 2.57  | 1.98    | 2.43   | 2.11      | 1.93  | 1.90     | 2.34  | 2.28      |
| CCl3  | 5.15  | 4.45    | 5.04   | 4.67      | 4.78  | 4.70     | 5.11  | 4.77      |
| CBr3  | 6.02  | 5.19    | 5.87   | 5.44      | 5.68  | 5.55     | 5.99  | 5.51      |
| CI3   | 7.05  | 6.18    | 6.90   | 6.44      | 6.81  | 6.62     | 7.05  | 6.50      |
| SiMe3 | 3.42  | 2.40    | 2.93   | 2.38      | 1.70  | 1.57     | 1.75  | 2.16      |
| MAD   | 0.83  | 0.25    | 0.47   | 0.14      | 0.59  | 0.63     | 0.44  | 0.08      |

| MN15-D3BJ | mPW2PLYP | mPW2PLYP-D | PBEQIDH | PBEQIDH-D3BJ | B97MV | wB97MV | PBE0DH | PBE0DH-D3BJ |
|-----------|----------|------------|---------|--------------|-------|--------|--------|-------------|
| -0.04     | 0.16     | 0.07       | 0.21    | 0.20         | 0.12  | 0.02   | 0.27   | 0.24        |
| -0.15     | 0.66     | 0.45       | 0.43    | 0.34         | 0.27  | 0.19   | 0.57   | 0.21        |
| -0.17     | 0.82     | 0.50       | 0.44    | 0.30         | 0.36  | 0.22   | 0.61   | 0.11        |
| -0.19     | 0.95     | 0.52       | 0.44    | 0.23         | 0.49  | 0.23   | 0.64   | -0.02       |
| -0.24     | 0.66     | 0.34       | 0.29    | 0.17         | 0.31  | 0.14   | 0.52   | 0.12        |
| -0.53     | 0.34     | 0.04       | 0.00    | -0.10        | -0.01 | -0.16  | 0.21   | -0.17       |
| 1.45      | 2.07     | 1.66       | 1.91    | 1.84         | 1.98  | 1.74   | 2.04   | 1.75        |
| 1.20      | 2.04     | 1.51       | 1.81    | 1.69         | 1.83  | 1.58   | 2.00   | 1.60        |
| 0.59      | 1.05     | 0.73       | 0.90    | 0.84         | 0.93  | 0.78   | 1.02   | 0.79        |
| 0.79      | 1.90     | 1.22       | 1.58    | 1.43         | 1.53  | 1.30   | 1.85   | 1.34        |
| 1.03      | 1.83     | 1.28       | 1.54    | 1.43         | 1.63  | 1.35   | 1.78   | 1.37        |
| 4.58      | 5.32     | 4.75       | 5.26    | 5.09         | 5.13  | 4.80   | 5.44   | 4.96        |
| 2.15      | 3.54     | 2.70       | 2.94    | 2.71         | 3.03  | 2.65   | 3.28   | 2.57        |
| 4.47      | 4.34     | 3.82       | 4.37    | 4.19         | 4.45  | 4.13   | 4.52   | 4.04        |
| 2.29      | 3.93     | 3.06       | 3.22    | 2.96         | 3.32  | 2.93   | 3.61   | 2.81        |
| 2.34      | 2.36     | 1.99       | 2.52    | 2.44         | 2.24  | 2.09   | 2.58   | 2.35        |
| 5.11      | 5.03     | 4.76       | 5.18    | 5.01         | 5.10  | 4.71   | 5.25   | 4.82        |
| 5.99      | 5.87     | 5.53       | 5.98    | 5.76         | 6.02  | 5.55   | 6.07   | 5.55        |
| 7.05      | 6.92     | 6.54       | 7.03    | 6.75         | 7.18  | 6.60   | 7.12   | 6.53        |
| 1.75      | 2.84     | 2.11       | 2.58    | 2.32         | 2.21  | 2.12   | 2.80   | 2.11        |
| 0.44      | 0.44     | 0.13       | 0.24    | 0.12         | 0.23  | 0.10   | 0.41   | 0.11        |

| wB97MV | wB97XV | revM06 | revM06L | VV10 | PBE  | PBE-D3 | BLYP | BLYP-D3 |
|--------|--------|--------|---------|------|------|--------|------|---------|
| 0.02   | -0.02  | -0.02  | -0.03   | 0.06 | 0.38 | 0.28   | 0.35 | 0.17    |
| 0.19   | 0.27   | 0.16   | 0.38    | 0.26 | 0.76 | 0.48   | 1.11 | 0.45    |
| 0.22   | 0.34   | 0.24   | 0.62    | 0.35 | 0.88 | 0.54   | 1.43 | 0.61    |
| 0.23   | 0.40   | 0.33   | 0.91    | 0.32 | 0.91 | 0.54   | 1.63 | 0.75    |
| 0.14   | 0.21   | 0.06   | 0.42    | 0.31 | 0.83 | 0.56   | 1.32 | 0.74    |
| -0.16  | -0.10  | -0.28  | 0.05    | 0.03 | 0.51 | 0.25   | 0.98 | 0.43    |
| 1.74   | 1.74   | 1.70   | 2.02    | 1.74 | 2.20 | 1.91   | 2.43 | 1.90    |
| 1.58   | 1.63   | 1.53   | 1.91    | 1.62 | 2.22 | 1.81   | 2.56 | 1.79    |
| 0.78   | 0.82   | 0.78   | 1.02    | 0.83 | 1.16 | 0.95   | 1.37 | 0.95    |
| 1.30   | 1.38   | 1.21   | 1.61    | 1.42 | 2.17 | 1.63   | 2.63 | 1.58    |
| 1.35   | 1.46   | 1.41   | 1.89    | 1.47 | 2.05 | 1.69   | 2.50 | 1.75    |
| 4.80   | 4.87   | 5.06   | 5.56    | 4.54 | 5.35 | 4.84   | 5.68 | 4.68    |
| 2.65   | 2.81   | 2.77   | 3.51    | 2.79 | 3.71 | 3.11   | 4.64 | 3.51    |
| 4.13   | 4.13   | 4.78   | 5.35    | 3.56 | 4.35 | 3.89   | 4.53 | 3.68    |
| 2.93   | 3.12   | 3.03   | 3.81    | 3.08 | 4.10 | 3.41   | 5.17 | 3.81    |
| 2.09   | 2.09   | 2.36   | 2.42    | 1.81 | 2.45 | 2.11   | 2.54 | 1.83    |
| 4.71   | 4.72   | 5.41   | 5.81    | 4.10 | 4.87 | 4.44   | 4.96 | 4.10    |
| 5.55   | 5.56   | 6.39   | 6.95    | 4.84 | 5.65 | 5.17   | 5.81 | 4.82    |
| 6.60   | 6.61   | 7.53   | 8.27    | 5.78 | 6.60 | 6.11   | 6.77 | 5.74    |
| 2.12   | 2.24   | 2.17   | 2.62    | 2.02 | 2.97 | 2.35   | 3.59 | 2.35    |
| 0.10   | 0.09   | 0.28   | 0.58    | 0.21 | 0.51 | 0.22   | 0.91 | 0.37    |



| M06   | M06D3 | M06L  | M06L-D3 | M06HF | M06H-FD3 | PBE0-D3BJ | BMK-D3BJ | CAM-B3LYP-D3BJ |
|-------|-------|-------|---------|-------|----------|-----------|----------|----------------|
| 0.01  | -0.03 | -0.27 | -0.28   | 0.27  | 0.25     | 0.30      | 0.04     | 0.11           |
| 0.07  | 0.05  | -0.38 | -0.37   | 0.52  | 0.52     | 0.37      | -0.19    | 0.45           |
| 0.22  | 0.21  | -0.31 | -0.29   | 0.37  | 0.37     | 0.35      | -0.23    | 0.55           |
| 0.36  | 0.36  | -0.24 | -0.21   | 0.29  | 0.31     | 0.26      | -0.33    | 0.57           |
| 0.06  | 0.00  | -0.08 | -0.10   | 0.09  | 0.05     | 0.29      | -0.22    | 0.48           |
| -0.18 | -0.23 | -0.24 | -0.24   | -0.27 | -0.29    | 0.00      | -0.46    | 0.16           |
| 1.76  | 1.66  | 1.26  | 1.25    | 1.85  | 1.80     | 1.81      | 1.32     | 1.88           |
| 1.57  | 1.44  | 1.05  | 1.03    | 1.61  | 1.54     | 1.69      | 1.14     | 1.79           |
| 0.85  | 0.78  | 0.53  | 0.52    | 0.76  | 0.73     | 0.85      | 0.58     | 0.91           |
| 1.25  | 1.07  | 0.81  | 0.77    | 1.29  | 1.19     | 1.46      | 0.82     | 1.58           |
| 1.39  | 1.29  | 1.04  | 1.02    | 1.03  | 0.97     | 1.51      | 1.09     | 1.62           |
| 4.89  | 4.68  | 4.44  | 4.40    | 4.97  | 4.85     | 4.87      | 4.26     | 4.93           |
| 2.76  | 2.55  | 1.94  | 1.88    | 2.61  | 2.48     | 2.76      | 2.14     | 3.06           |
| 4.17  | 4.00  | 3.77  | 3.72    | 4.60  | 4.49     | 3.92      | 3.44     | 3.99           |
| 3.10  | 2.88  | 2.12  | 2.06    | 2.97  | 2.84     | 3.04      | 2.43     | 3.43           |
| 2.67  | 2.57  | 1.96  | 1.92    | 2.70  | 2.64     | 2.28      | 1.86     | 2.14           |
| 4.78  | 4.66  | 4.40  | 4.39    | 5.32  | 5.26     | 4.64      | 4.03     | 4.61           |
| 5.51  | 5.40  | 5.33  | 5.33    | 6.07  | 6.03     | 5.39      | 4.78     | 5.41           |
| 6.53  | 6.44  | 6.53  | 6.55    | 6.91  | 6.89     | 6.35      | 5.68     | 6.41           |
| 1.85  | 1.68  | 1.65  | 1.58    | 2.28  | 2.15     | 2.13      | 1.40     | 2.27           |
| 0.15  | 0.19  | 0.46  | 0.48    | 0.22  | 0.23     | 0.07      | 0.52     | 0.16           |

| CAMB3LYP | APF  | PBE0 | BMK  | $\omega$ B97X-D | B97-D3 | M062X | APF-D | TPSS | TPSS-D3BJ |
|----------|------|------|------|-----------------|--------|-------|-------|------|-----------|
| 0.15     | 0.35 | 0.34 | 0.10 | 0.24            | 0.45   | 0.04  | 0.02  | 0.29 | 0.23      |
| 0.79     | 0.77 | 0.71 | 0.42 | 0.57            | 0.38   | 0.16  | 0.31  | 0.69 | 0.19      |
| 1.01     | 0.87 | 0.79 | 0.64 | 0.68            | 0.44   | 0.19  | 0.09  | 0.77 | 0.14      |
| 1.20     | 0.92 | 0.84 | 0.92 | 0.77            | 0.36   | 0.22  | 0.10  | 0.83 | 0.01      |
| 0.93     | 0.81 | 0.74 | 0.43 | 0.32            | 0.23   | 0.08  | 0.32  | 0.78 | 0.14      |
| 0.57     | 0.49 | 0.42 | 0.13 | 0.06            | -0.05  | -0.22 | 0.07  | 0.51 | -0.09     |
| 2.22     | 2.20 | 2.16 | 1.78 | 1.59            | 1.72   | 1.67  | 1.82  | 2.04 | 1.55      |
| 2.26     | 2.23 | 2.17 | 1.77 | 1.44            | 1.57   | 1.51  | 1.61  | 2.07 | 1.39      |
| 1.17     | 1.17 | 1.13 | 0.94 | 0.74            | 0.81   | 0.77  | 0.78  | 1.07 | 0.69      |
| 2.20     | 2.18 | 2.10 | 1.65 | 1.19            | 1.31   | 1.29  | 1.26  | 2.02 | 1.13      |
| 2.08     | 2.08 | 2.00 | 1.71 | 1.41            | 1.50   | 1.29  | 1.38  | 1.93 | 1.25      |
| 5.58     | 5.60 | 5.51 | 5.09 | 4.45            | 4.67   | 4.69  | 4.72  | 5.33 | 4.46      |
| 3.90     | 3.76 | 3.61 | 3.25 | 2.82            | 2.87   | 2.50  | 2.76  | 3.62 | 2.45      |
| 4.64     | 4.61 | 4.55 | 4.29 | 3.77            | 3.58   | 4.28  | 3.84  | 4.38 | 3.52      |
| 4.35     | 4.16 | 3.99 | 3.67 | 3.17            | 3.14   | 2.85  | 2.95  | 3.94 | 2.63      |
| 2.45     | 2.67 | 2.59 | 2.28 | 2.23            | 2.40   | 2.21  | 1.97  | 2.52 | 2.11      |
| 5.21     | 5.23 | 5.19 | 4.90 | 4.65            | 4.30   | 4.87  | 4.55  | 5.02 | 4.28      |
| 6.12     | 6.04 | 6.01 | 5.88 | 5.42            | 4.96   | 5.77  | 5.20  | 5.82 | 4.97      |
| 7.22     | 7.05 | 7.03 | 7.01 | 6.44            | 5.83   | 6.78  | 6.27  | 6.83 | 5.91      |
| 3.15     | 3.13 | 2.98 | 2.66 | 1.95            | 1.98   | 1.96  | 2.14  | 3.09 | 1.93      |
| 0.66     | 0.62 | 0.55 | 0.29 | 0.19            | 0.19   | 0.17  | 0.11  | 0.48 | 0.26      |

| PBE-D4 | PBE0-D4 | PBE0-DH-D4 | PBE-QIDH-D4 |
|--------|---------|------------|-------------|
| 0.22   | 0.20    | 0.19       | 0.18        |
| 0.29   | 0.31    | 0.35       | 0.33        |
| 0.31   | 0.30    | 0.35       | 0.31        |
| 0.20   | 0.22    | 0.32       | 0.27        |
| 0.25   | 0.22    | 0.20       | 0.13        |
| -0.01  | -0.05   | -0.06      | -0.14       |
| 1.76   | 1.78    | 1.81       | 1.80        |
| 1.64   | 1.65    | 1.67       | 1.65        |
| 0.82   | 0.83    | 0.83       | 0.81        |
| 1.43   | 1.43    | 1.42       | 1.37        |
| 1.48   | 1.49    | 1.46       | 1.38        |
| 4.69   | 4.80    | 4.97       | 5.03        |
| 2.76   | 2.74    | 2.71       | 2.65        |
| 3.63   | 3.87    | 4.08       | 4.14        |
| 3.04   | 3.03    | 2.99       | 2.90        |
| 1.96   | 2.14    | 2.30       | 2.39        |
| 4.18   | 4.54    | 4.85       | 4.97        |
| 4.88   | 5.29    | 5.64       | 5.75        |
| 5.78   | 6.24    | 6.67       | 6.78        |
| 2.02   | 2.09    | 2.23       | 2.28        |
| 0.18   | 0.08    | 0.07       | 0.11        |

**Table S6.** Energy differences (kcal/mol) between the axial and equatorial conformers, computed using the selected functionals and the 6-31G\*-ACP model

Mean Absolute Errors are computed with respect to the CCSD(T)-CBS(3,4) data.

|       | B3LYP  | CAM-B3LYP | M06-2X |
|-------|--------|-----------|--------|
| F     | 0.546  | 0.037     | 0.177  |
| Cl    | 0.780  | 0.492     | 0.420  |
| Br    | -      | -         | -      |
| I     | -      | -         | -      |
| CCH   | -0.123 | -0.229    | -0.455 |
| CN    | -0.136 | -0.277    | -0.540 |
| Me    | 2.071  | 2.021     | 1.734  |
| Et-A  | 1.891  | 1.936     | 1.653  |
| Et-B  | 1.021  | 1.060     | 0.912  |
| iPr-A | 1.493  | 1.757     | 1.547  |
| iPr-B | 1.547  | 1.812     | 1.462  |
| tBu   | 5.609  | 5.288     | 4.701  |
| Ph-B  | 2.979  | 3.134     | 2.719  |
| Ph-C  | 4.643  | 4.480     | 4.129  |
| Ph-D  | 3.098  | 3.463     | 3.026  |
| CF3   | 2.832  | 2.146     | 2.234  |
| CCl3  | 5.629  | 4.780     | 4.819  |
| CBr3  | -      | -         | -      |
| CI3   | -      | -         | -      |
| SiMe3 | 3.056  | 3.076     | 2.524  |
| MAD   | 0.394  | 0.330     | 0.148  |

**Table S7.** Energy differences (kcal/mol) between the axial and equatorial conformers, computed using the selected functionals the DH-SVPD basis set. Mean Absolute Errors are computed with respect to the CCSD(T)-CBS(3,4) data.

| R     | PBEQIDH | PBE0DH | B2PLYP |
|-------|---------|--------|--------|
| F     | 0.06    | 0.14   | 0.09   |
| Cl    | 0.13    | 0.28   | 0.5    |
| Br    | 0.22    | 0.36   | 0.7    |
| I     | 0.33    | 0.47   | 0.89   |
| CCH   | 0.08    | 0.33   | 0.48   |
| CN    | -0.18   | 0.06   | 0.18   |
| Me    | 1.69    | 1.8    | 1.84   |
| Et-A  | 1.57    | 1.74   | 1.8    |
| Et-B  | 0.75    | 0.86   | 0.88   |
| iPr-A | 1.36    | 1.62   | 1.69   |
| iPr-B | 1.38    | 1.6    | 1.67   |
| tBu   | 5.11    | 5.19   | 5.12   |
| Ph-B  | 2.72    | 3.04   | 3.35   |
| Ph-C  | 4.13    | 4.24   | 4.13   |
| Ph-D  | 2.94    | 3.32   | 3.68   |
| CF3   | 2.3     | 2.39   | 2.27   |
| CCl3  | 4.67    | 4.69   | 4.61   |
| CBr3  | 5.62    | 5.64   | 5.58   |
| CI3   | 6.84    | 6.81   | 6.74   |
| SiMe3 | 2.21    | 2.42   | 2.52   |
| MAD   | 0.13    | 0.17   | 0.26   |

**Table S8.** Differences in Gibbs free-energies ( $\Delta G$ ), Enthalpies ( $\Delta H$ ), Energies with zero-point energies ( $\Delta E+ZPE$ ) and Energies ( $\Delta E$ ) between the axial and equatorial Conformers, computed with the selected functionals and the Def2-TZVPP basis set.

|       | B2-PLYP-D3 |            |                |            | PBE-QIDH   |            |                |            | M06-HF     |            |                |            | B3-LYP-D3  |            |                |            | M06-HF-D3  |            |                |            |
|-------|------------|------------|----------------|------------|------------|------------|----------------|------------|------------|------------|----------------|------------|------------|------------|----------------|------------|------------|------------|----------------|------------|
|       | $\Delta G$ | $\Delta H$ | $\Delta E+ZPE$ | $\Delta E$ | $\Delta G$ | $\Delta H$ | $\Delta E+ZPE$ | $\Delta E$ | $\Delta G$ | $\Delta H$ | $\Delta E+ZPE$ | $\Delta E$ | $\Delta G$ | $\Delta H$ | $\Delta E+ZPE$ | $\Delta E$ | $\Delta G$ | $\Delta H$ | $\Delta E+ZPE$ | $\Delta E$ |
| F     | 0.17       | 0.13       | 0.14           | 0.11       | 0.31       | 0.27       | 0.29           | 0.22       | 0.35       | 0.31       | 0.32           | 0.27       | 0.18       | 0.15       | 0.16           | 0.14       | 0.33       | 0.29       | 0.30           | 0.25       |
| Cl    | 0.51       | 0.32       | 0.39           | 0.30       | 0.64       | 0.48       | 0.54           | 0.43       | 0.71       | 0.55       | 0.61           | 0.50       | 0.46       | 0.28       | 0.34           | 0.27       | 0.71       | 0.55       | 0.61           | 0.50       |
| Br    | 0.48       | 0.27       | 0.35           | 0.27       | 0.61       | 0.42       | 0.50           | 0.41       | 0.57       | 0.36       | 0.44           | 0.36       | 0.38       | 0.17       | 0.25           | 0.19       | 0.57       | 0.36       | 0.44           | 0.37       |
| I     | 0.52       | 0.29       | 0.38           | 0.32       | 0.61       | 0.39       | 0.48           | 0.40       | 0.47       | 0.25       | 0.34           | 0.30       | 0.42       | 0.19       | 0.27           | 0.24       | 0.49       | 0.27       | 0.35           | 0.32       |
| CCH   | 0.54       | 0.42       | 0.46           | 0.36       | 0.46       | 0.33       | 0.38           | 0.27       | 0.23       | 0.11       | 0.15           | 0.09       | 0.71       | 0.60       | 0.64           | 0.55       | 0.19       | 0.08       | 0.11           | 0.05       |
| CN    | 0.23       | 0.12       | 0.16           | 0.08       | 0.15       | 0.03       | 0.07           | -0.02      | -0.13      | -0.25      | -0.21          | -0.28      | 0.36       | 0.26       | 0.30           | 0.22       | -0.15      | -0.26      | -0.22          | -0.29      |
| Me    | 2.13       | 2.01       | 2.06           | 1.84       | 2.22       | 2.10       | 2.15           | 1.91       | 2.10       | 2.04       | 2.06           | 1.86       | 2.14       | 2.02       | 2.07           | 1.84       | 2.05       | 2.00       | 2.02           | 1.81       |
| Et-A  | 1.95       | 1.87       | 1.93           | 1.70       | 2.08       | 1.98       | 2.05           | 1.79       | 2.00       | 1.72       | 1.83           | 1.62       | 1.98       | 1.88       | 1.94           | 1.71       | 1.93       | 1.65       | 1.76           | 1.55       |
| Et-B  | 0.96       | 0.93       | 0.96           | 0.86       | 1.03       | 0.98       | 1.02           | 0.89       | 1.21       | 0.84       | 0.94           | 0.75       | 0.97       | 0.96       | 0.99           | 0.90       | 1.18       | 0.80       | 0.91           | 0.71       |
| iPr-A | 1.63       | 1.61       | 1.70           | 1.43       | 1.84       | 1.74       | 1.85           | 1.56       | 2.12       | 1.53       | 1.72           | 1.31       | 1.71       | 1.66       | 1.75           | 1.47       | 2.03       | 1.43       | 1.62           | 1.21       |
| iPr-B | 1.45       | 1.65       | 1.71           | 1.52       | 1.60       | 1.67       | 1.75           | 1.52       | 1.69       | 1.27       | 1.42           | 1.04       | 1.57       | 1.79       | 1.84           | 1.68       | 1.56       | 1.21       | 1.35           | 0.98       |
| tBu   | 5.99       | 5.09       | 5.30           | 4.89       | 6.49       | 5.48       | 5.71           | 5.24       | 5.82       | 5.11       | 5.33           | 5.01       | 5.45       | 4.94       | 5.09           | 4.79       | 5.69       | 4.99       | 5.21           | 4.89       |
| Ph-B  | 3.48       | 3.13       | 3.25           | 2.95       | 3.55       | 3.08       | 3.23           | 2.89       | 3.29       | 2.75       | 2.90           | 2.59       | 3.55       | 3.26       | 3.38           | 3.10       | 3.16       | 2.62       | 2.77           | 2.47       |
| Ph-C  | 3.86       | 4.23       | 4.26           | 4.01       | 4.24       | 4.62       | 4.67           | 4.36       | 3.83       | 4.86       | 4.88           | 4.60       | 3.69       | 4.10       | 4.12           | 3.92       | 4.07       | 4.76       | 4.79           | 4.49       |
| Ph-D  | 3.48       | 3.13       | 3.25           | 2.95       | 3.55       | 3.08       | 3.23           | 2.89       | 3.29       | 2.75       | 2.90           | 2.59       | 3.55       | 3.26       | 3.37           | 3.10       | 3.16       | 2.62       | 2.77           | 2.47       |
| CF3   | 2.45       | 2.25       | 2.32           | 2.12       | 2.80       | 2.64       | 2.70           | 2.51       | 2.90       | 2.79       | 2.86           | 2.71       | 2.34       | 2.12       | 2.20           | 2.01       | 2.84       | 2.73       | 2.79           | 2.65       |
| CCl3  | 4.80       | 4.72       | 4.76           | 4.66       | 5.33       | 5.28       | 5.31           | 5.17       | 5.27       | 5.30       | 5.32           | 5.33       | 4.57       | 4.48       | 4.52           | 4.43       | 5.22       | 5.24       | 5.26           | 5.27       |
| CBr3  | 5.44       | 5.41       | 5.42           | 5.37       | 6.04       | 6.01       | 6.03           | 5.92       | 5.91       | 5.99       | 5.99           | 6.07       | 5.17       | 5.13       | 5.14           | 5.11       | 5.87       | 5.95       | 5.94           | 6.02       |
| Cl3   | 6.36       | 6.41       | 6.40           | 6.39       | 7.00       | 7.05       | 7.04           | 6.97       | 6.79       | 6.93       | 6.91           | 6.92       | 6.07       | 6.12       | 6.10           | 6.13       | 6.77       | 6.91       | 6.89           | 6.90       |
| SiMe3 | 2.82       | 2.43       | 2.58           | 2.27       | 3.24       | 2.70       | 2.87           | 2.55       | 3.46       | 2.33       | 2.57           | 2.24       | 2.36       | 2.33       | 2.45           | 2.19       | 3.34       | 2.21       | 2.45           | 2.30       |

|       | PBE-D3 |      |        |      | CAM-B3LYP-D3BJ |      |        |      | ωB97X-D |      |        |       | B97-D3 |       |        |       | M06-2X |       |        |       |
|-------|--------|------|--------|------|----------------|------|--------|------|---------|------|--------|-------|--------|-------|--------|-------|--------|-------|--------|-------|
|       | ΔG     | ΔH   | ΔE+ZPE | ΔE   | ΔG             | ΔH   | ΔE+ZPE | ΔE   | ΔG      | ΔH   | ΔE+ZPE | ΔE    | ΔG     | ΔH    | ΔE+ZPE | ΔE    | ΔG     | ΔH    | ΔE+ZPE | ΔE    |
| F     | 0.31   | 0.28 | 0.29   | 0.26 | 0.17           | 0.14 | 0.15   | 0.12 | 0.29    | 0.25 | 0.26   | 0.22  | 0.42   | 0.39  | 0.40   | 0.39  | 0.10   | 0.08  | 0.09   | 0.05  |
| Cl    | 0.58   | 0.42 | 0.48   | 0.42 | 0.56           | 0.41 | 0.47   | 0.40 | 0.68    | 0.52 | 0.58   | 0.48  | 0.42   | 0.28  | 0.33   | 0.29  | 0.35   | 0.18  | 0.24   | 0.15  |
| Br    | 0.52   | 0.33 | 0.40   | 0.36 | 0.56           | 0.40 | 0.46   | 0.39 | 0.64    | 0.48 | 0.54   | 0.47  | 0.35   | 0.18  | 0.24   | 0.23  | 0.33   | 0.11  | 0.19   | 0.10  |
| I     | 0.49   | 0.28 | 0.36   | 0.35 | 0.57           | 0.38 | 0.46   | 0.40 | 0.71    | 0.52 | 0.59   | 0.53  | 0.25   | 0.06  | 0.13   | 0.14  | 0.34   | 0.11  | 0.20   | 0.12  |
| CCH   | 0.64   | 0.52 | 0.57   | 0.48 | 0.57           | 0.45 | 0.50   | 0.38 | 0.38    | 0.27 | 0.31   | 0.22  | 0.35   | 0.22  | 0.26   | 0.16  | 0.28   | 0.12  | 0.17   | 0.05  |
| CN    | 0.31   | 0.20 | 0.24   | 0.16 | 0.23           | 0.12 | 0.16   | 0.06 | 0.10    | 0.00 | 0.04   | -0.04 | 0.04   | -0.08 | -0.04  | -0.13 | -0.06  | -0.20 | -0.15  | -0.25 |
| Me    | 2.19   | 2.07 | 2.11   | 1.89 | 2.17           | 2.05 | 2.10   | 1.87 | 1.89    | 1.76 | 1.81   | 1.57  | 2.00   | 1.89  | 1.93   | 1.71  | 1.98   | 1.86  | 1.91   | 1.67  |
| Et-A  | 2.01   | 1.91 | 1.97   | 1.75 | 2.02           | 1.93 | 1.99   | 1.74 | 1.59    | 1.56 | 1.61   | 1.41  | 1.81   | 1.72  | 1.78   | 1.54  | 1.94   | 1.73  | 1.83   | 1.50  |
| Et-B  | 0.96   | 0.96 | 0.99   | 0.91 | 0.98           | 0.95 | 0.99   | 0.88 | 0.81    | 0.77 | 0.80   | 0.72  | 0.85   | 0.85  | 0.87   | 0.79  | 1.13   | 0.87  | 0.95   | 0.75  |
| iPr-A | 1.83   | 1.70 | 1.80   | 1.54 | 1.84           | 1.72 | 1.82   | 1.52 | 1.68    | 1.47 | 1.60   | 1.13  | 1.72   | 1.47  | 1.59   | 1.26  | 1.69   | 1.50  | 1.62   | 1.28  |
| iPr-B | 1.63   | 1.74 | 1.80   | 1.63 | 1.69           | 1.74 | 1.82   | 1.58 | 1.70    | 1.64 | 1.76   | 1.37  | 1.68   | 1.63  | 1.72   | 1.46  | 1.58   | 1.45  | 1.56   | 1.28  |
| tBu   | 5.19   | 4.85 | 4.97   | 4.71 | 5.70           | 5.09 | 5.26   | 4.85 | 5.50    | 4.58 | 4.79   | 4.42  | 5.24   | 4.78  | 4.93   | 4.58  | 5.85   | 4.99  | 5.24   | 4.70  |
| Ph-B  | 3.46   | 3.09 | 3.21   | 2.96 | 3.56           | 3.13 | 3.26   | 2.91 | 3.19    | 2.81 | 2.93   | 2.65  | 3.36   | 2.95  | 3.09   | 2.75  | 3.17   | 2.68  | 2.84   | 2.43  |
| Ph-C  | 3.64   | 4.06 | 4.10   | 3.85 | 4.02           | 4.24 | 4.29   | 3.95 | 3.71    | 3.96 | 4.00   | 3.71  | 3.61   | 3.82  | 3.87   | 3.58  | 4.20   | 4.56  | 4.60   | 4.24  |
| Ph-D  | 3.46   | 3.09 | 3.21   | 2.96 | 3.56           | 3.13 | 3.26   | 2.91 | 3.19    | 2.81 | 2.93   | 2.65  | 3.36   | 2.95  | 3.09   | 2.75  | 3.17   | 2.68  | 2.84   | 2.43  |
| CF3   | 2.37   | 2.20 | 2.26   | 2.10 | 2.42           | 2.26 | 2.32   | 2.15 | 2.31    | 2.25 | 2.28   | 2.20  | 2.52   | 2.43  | 2.47   | 2.35  | 2.47   | 2.34  | 2.40   | 2.22  |
| CCl3  | 4.56   | 4.48 | 4.51   | 4.42 | 4.78           | 4.70 | 4.74   | 4.59 | 4.78    | 4.71 | 4.74   | 4.60  | 4.51   | 4.39  | 4.44   | 4.29  | 4.97   | 4.95  | 4.98   | 4.85  |
| CBr3  | 5.16   | 5.12 | 5.13   | 5.08 | 5.47           | 5.42 | 5.44   | 5.32 | 5.29    | 5.31 | 5.31   | 5.28  | 5.07   | 4.99  | 5.01   | 4.91  | 5.66   | 5.73  | 5.73   | 5.66  |
| Cl3   | 6.05   | 6.06 | 6.05   | 6.04 | 6.40           | 6.42 | 6.41   | 6.33 | 6.06    | 6.24 | 6.19   | 6.30  | 5.90   | 5.86  | 5.86   | 5.79  | 6.69   | 6.77  | 6.75   | 6.68  |
| SiMe3 | 1.89   | 2.29 | 2.40   | 2.20 | 2.66           | 2.36 | 2.50   | 2.17 | 2.57    | 2.01 | 2.18   | 1.89  | 2.48   | 2.06  | 2.22   | 1.91  | 3.81   | 2.17  | 2.49   | 1.93  |

|       | B2-PLYP-D3 |            |                |            | M06-D3     |            |                |            | M06        |            |                |            | PBE0-D3BJ  |            |                |            | mPW2-PLYP  |            |                |            |
|-------|------------|------------|----------------|------------|------------|------------|----------------|------------|------------|------------|----------------|------------|------------|------------|----------------|------------|------------|------------|----------------|------------|
|       | $\Delta G$ | $\Delta H$ | $\Delta E+ZPE$ | $\Delta E$ | $\Delta G$ | $\Delta H$ | $\Delta E+ZPE$ | $\Delta E$ | $\Delta G$ | $\Delta H$ | $\Delta E+ZPE$ | $\Delta E$ | $\Delta G$ | $\Delta H$ | $\Delta E+ZPE$ | $\Delta E$ | $\Delta G$ | $\Delta H$ | $\Delta E+ZPE$ | $\Delta E$ |
| F     | 0.17       | 0.13       | 0.14           | 0.11       | 0.16       | 0.09       | 0.11           | 0.00       | 0.20       | 0.13       | 0.15           | 0.04       | 0.37       | 0.34       | 0.35           | 0.30       | 0.23       | 0.19       | 0.20           | 0.16       |
| Cl    | 0.51       | 0.32       | 0.39           | 0.30       | 0.11       | 0.01       | 0.05           | -0.01      | 0.14       | 0.03       | 0.07           | 0.01       | 0.52       | 0.37       | 0.43           | 0.35       | 0.78       | 0.63       | 0.69           | 0.61       |
| Br    | 0.48       | 0.27       | 0.35           | 0.27       | 0.18       | 0.06       | 0.11           | 0.05       | 0.20       | 0.07       | 0.12           | 0.07       | 0.44       | 0.26       | 0.33           | 0.27       | 0.84       | 0.67       | 0.74           | 0.68       |
| I     | 0.52       | 0.29       | 0.38           | 0.32       | 0.30       | 0.15       | 0.21           | 0.17       | 0.30       | 0.15       | 0.21           | 0.18       | 0.35       | 0.13       | 0.22           | 0.18       | 0.95       | 0.76       | 0.84           | 0.79       |
| CCH   | 0.54       | 0.42       | 0.46           | 0.36       | 0.14       | 0.00       | 0.05           | -0.07      | 0.20       | 0.06       | 0.11           | -0.01      | 0.45       | 0.32       | 0.36           | 0.25       | 0.74       | 0.62       | 0.66           | 0.56       |
| CN    | 0.23       | 0.12       | 0.16           | 0.08       | -0.11      | -0.24      | -0.20          | -0.30      | -0.05      | -0.18      | -0.14          | -0.24      | 0.12       | 0.01       | 0.05           | -0.05      | 0.39       | 0.29       | 0.33           | 0.25       |
| Me    | 2.13       | 2.01       | 2.06           | 1.84       | 1.81       | 1.80       | 1.80           | 1.65       | 1.90       | 1.89       | 1.89           | 1.75       | 2.15       | 2.01       | 2.06           | 1.81       | 2.33       | 2.23       | 2.27           | 2.05       |
| Et-A  | 1.95       | 1.87       | 1.93           | 1.70       | 1.80       | 1.59       | 1.66           | 1.42       | 1.93       | 1.72       | 1.79           | 1.55       | 1.95       | 1.85       | 1.92           | 1.66       | 2.22       | 2.14       | 2.20           | 1.97       |
| Et-B  | 0.96       | 0.93       | 0.96           | 0.86       | 1.13       | 0.84       | 0.91           | 0.76       | 1.20       | 0.90       | 0.98           | 0.82       | 0.94       | 0.92       | 0.95           | 0.84       | 1.08       | 1.07       | 1.10           | 1.00       |
| iPr-A | 1.63       | 1.61       | 1.70           | 1.43       | 1.76       | 1.30       | 1.45           | 1.04       | 1.93       | 1.47       | 1.62           | 1.22       | 1.73       | 1.61       | 1.71           | 1.43       | 2.11       | 1.99       | 2.08           | 1.81       |
| iPr-B | 1.45       | 1.65       | 1.71           | 1.52       | 2.05       | 1.52       | 1.70           | 1.28       | 2.16       | 1.62       | 1.79           | 1.37       | 1.56       | 1.64       | 1.71           | 1.49       | 1.86       | 1.92       | 2.00           | 1.77       |
| tBu   | 5.99       | 5.09       | 5.30           | 4.89       | 5.78       | 4.87       | 5.10           | 4.62       | 5.98       | 5.06       | 5.29           | 4.83       | 5.67       | 5.03       | 5.21           | 4.82       | 6.03       | 5.43       | 5.60           | 5.23       |
| Ph-B  | 3.48       | 3.13       | 3.25           | 2.95       | 3.13       | 2.56       | 2.70           | 2.42       | 3.30       | 2.74       | 2.88           | 2.61       | 3.33       | 2.88       | 3.02           | 2.68       | 3.97       | 3.54       | 3.67           | 3.35       |
| Ph-C  | 3.86       | 4.23       | 4.26           | 4.01       | 3.13       | 2.56       | 2.70           | 2.42       | 3.30       | 2.74       | 2.88           | 2.61       | 3.92       | 4.18       | 4.23           | 3.90       | 4.39       | 4.56       | 4.62           | 4.31       |
| Ph-D  | 3.48       | 3.13       | 3.25           | 2.95       | 3.13       | 2.56       | 2.70           | 2.42       | 3.30       | 2.74       | 2.88           | 2.61       | 3.33       | 2.88       | 3.02           | 2.68       | 3.97       | 3.54       | 3.67           | 3.35       |
| CF3   | 2.45       | 2.25       | 2.32           | 2.12       | 2.38       | 2.58       | 2.55           | 2.55       | 2.48       | 2.68       | 2.65           | 2.65       | 2.55       | 2.39       | 2.45           | 2.27       | 2.63       | 2.47       | 2.53           | 2.37       |
| CCl3  | 4.80       | 4.72       | 4.76           | 4.66       | 4.78       | 4.73       | 4.76           | 4.64       | 4.90       | 4.84       | 4.87           | 4.76       | 4.82       | 4.73       | 4.77           | 4.63       | 5.16       | 5.09       | 5.12           | 5.00       |
| CBr3  | 5.44       | 5.41       | 5.42           | 5.37       | 5.55       | 5.45       | 5.48           | 5.30       | 5.65       | 5.55       | 5.59           | 5.41       | 5.46       | 5.41       | 5.43           | 5.32       | 5.88       | 5.84       | 5.86           | 5.76       |
| Cl3   | 6.36       | 6.41       | 6.40           | 6.39       | 6.46       | 6.44       | 6.44           | 6.34       | 6.55       | 6.52       | 6.53           | 6.42       | 6.35       | 6.37       | 6.36           | 6.30       | 6.86       | 6.89       | 6.88           | 6.82       |
| SiMe3 | 2.82       | 2.43       | 2.58           | 2.27       | 3.09       | 1.83       | 2.09           | 1.66       | 3.53       | 2.01       | 2.30           | 1.83       | 2.64       | 2.23       | 2.38           | 2.08       | 2.68       | 2.83       | 2.95           | 2.69       |



|       | mPW2-PLYP-D |            |                |            | PBE0-DH-D3BJ |            |                |            | DSD-PBEP86 |            |                |            | M11-D3BJ   |            |                |            | MN15-D3BJ  |            |                |            |
|-------|-------------|------------|----------------|------------|--------------|------------|----------------|------------|------------|------------|----------------|------------|------------|------------|----------------|------------|------------|------------|----------------|------------|
|       | $\Delta G$  | $\Delta H$ | $\Delta E+ZPE$ | $\Delta E$ | $\Delta G$   | $\Delta H$ | $\Delta E+ZPE$ | $\Delta E$ | $\Delta G$ | $\Delta H$ | $\Delta E+ZPE$ | $\Delta E$ | $\Delta G$ | $\Delta H$ | $\Delta E+ZPE$ | $\Delta E$ | $\Delta G$ | $\Delta H$ | $\Delta E+ZPE$ | $\Delta E$ |
| F     | 0.16        | 0.10       | 0.12           | 0.07       | 0.34         | 0.30       | 0.31           | 0.25       | 0.24       | 0.19       | 0.20           | 0.15       | -0.32      | -0.41      | -0.38          | -0.47      | 0.15       | 0.06       | 0.09           | -0.03      |
| Cl    | 0.62        | 0.44       | 0.50           | 0.41       | 0.42         | 0.25       | 0.32           | 0.21       | 0.48       | 0.31       | 0.37           | 0.27       | -0.16      | -0.38      | -0.30          | -0.46      | 0.19       | -0.03      | 0.05           | -0.13      |
| Br    | 0.59        | 0.38       | 0.46           | 0.37       | 0.29         | 0.09       | 0.17           | 0.08       | 0.45       | 0.26       | 0.33           | 0.24       | -0.28      | -0.54      | -0.44          | -0.58      | 0.13       | -0.12      | -0.03          | -0.18      |
| I     | 0.60        | 0.36       | 0.45           | 0.37       | 0.17         | -0.06      | 0.03           | -0.05      | 0.45       | 0.22       | 0.31           | 0.22       | -0.27      | -0.55      | -0.45          | -0.60      | 0.08       | -0.18      | -0.08          | -0.21      |
| CCH   | 0.48        | 0.34       | 0.39           | 0.28       | 0.31         | 0.17       | 0.22           | 0.10       | 0.28       | 0.14       | 0.18           | 0.07       | -0.18      | -0.38      | -0.32          | -0.47      | 0.05       | -0.14      | -0.08          | -0.23      |
| CN    | 0.15        | 0.03       | 0.07           | -0.02      | -0.01        | -0.13      | -0.09          | -0.19      | -0.02      | -0.15      | -0.10          | -0.20      | -0.44      | -0.63      | -0.56          | -0.70      | -0.25      | -0.44      | -0.37          | -0.52      |
| Me    | 2.00        | 1.86       | 1.91           | 1.67       | 2.08         | 1.95       | 2.00           | 1.75       | 2.03       | 1.91       | 1.95           | 1.72       | 1.48       | 1.34       | 1.39           | 1.10       | 1.85       | 1.71       | 1.77           | 1.47       |
| Et-A  | 1.85        | 1.71       | 1.79           | 1.50       | 1.91         | 1.79       | 1.86           | 1.59       | 1.87       | 1.75       | 1.82           | 1.56       | 1.45       | 1.08       | 1.22           | 0.81       | 1.85       | 1.48       | 1.62           | 1.18       |
| Et-B  | 0.90        | 0.83       | 0.88           | 0.72       | 0.94         | 0.88       | 0.92           | 0.79       | 0.94       | 0.86       | 0.91           | 0.77       | 1.05       | 0.48       | 0.61           | 0.34       | 1.28       | 0.74       | 0.87           | 0.57       |
| iPr-A | 1.62        | 1.42       | 1.54           | 1.20       | 1.64         | 1.52       | 1.62           | 1.32       | 1.64       | 1.44       | 1.55           | 1.26       | 1.03       | 0.73       | 0.90           | 0.46       | 1.17       | 1.06       | 1.21           | 0.78       |
| iPr-B | 1.51        | 1.49       | 1.60           | 1.27       | 1.47         | 1.52       | 1.61           | 1.36       | 1.49       | 1.45       | 1.55           | 1.31       | 0.84       | 0.97       | 1.04           | 0.78       | 0.85       | 1.26       | 1.31           | 1.06       |
| tBu   | 5.74        | 5.00       | 5.21           | 4.73       | 6.07         | 5.18       | 5.40           | 4.94       | 6.08       | 5.07       | 5.31           | 4.83       | 5.43       | 4.67       | 4.92           | 4.32       | 5.55       | 4.89       | 5.11           | 4.61       |
| Ph-B  | 3.48        | 2.90       | 3.08           | 2.61       | 3.20         | 2.74       | 2.90           | 2.53       | 3.26       | 2.82       | 2.96           | 2.61       | 2.33       | 1.85       | 2.03           | 1.54       | 2.82       | 2.41       | 2.57           | 2.15       |
| Ph-C  | 4.24        | 4.17       | 4.26           | 3.80       | 3.97         | 4.31       | 4.36           | 4.02       | 3.83       | 4.23       | 4.28           | 3.96       | 2.33       | 1.85       | 2.03           | 1.54       | 5.91       | 4.17       | 4.76           | 4.45       |
| Ph-D  | 3.48        | 2.90       | 3.08           | 2.61       | 3.20         | 2.74       | 2.90           | 2.53       | 3.26       | 2.82       | 2.96           | 2.61       | 2.33       | 1.85       | 2.03           | 1.54       | 2.82       | 2.41       | 2.57           | 2.15       |
| CF3   | 2.36        | 2.12       | 2.21           | 1.99       | 2.63         | 2.47       | 2.53           | 2.34       | 2.56       | 2.41       | 2.47           | 2.28       | 2.22       | 2.09       | 2.15           | 1.91       | 2.64       | 2.52       | 2.58           | 2.35       |
| CCl3  | 4.93        | 4.84       | 4.88           | 4.73       | 5.00         | 4.93       | 4.97           | 4.81       | 4.92       | 4.88       | 4.91           | 4.76       | 4.74       | 4.79       | 4.80           | 4.70       | 5.15       | 5.21       | 5.21           | 5.09       |
| CBr3  | 5.59        | 5.55       | 5.57           | 5.45       | 5.65         | 5.62       | 5.64           | 5.51       | 5.58       | 5.56       | 5.58           | 5.47       | 5.47       | 5.58       | 5.57           | 5.48       | 5.90       | 5.98       | 5.97           | 5.87       |
| Cl3   | 6.53        | 6.57       | 6.56           | 6.49       | 6.54         | 6.58       | 6.58           | 6.49       | 6.49       | 6.54       | 6.53           | 6.47       | 6.50       | 6.62       | 6.59           | 6.54       | 6.86       | 7.01       | 6.98           | 6.93       |
| SiMe3 | 2.81        | 2.27       | 2.45           | 2.07       | 2.86         | 2.26       | 2.44           | 2.09       | 2.93       | 2.31       | 2.50           | 2.14       | 2.99       | 1.72       | 2.03           | 1.46       | 3.62       | 1.87       | 2.21           | 1.66       |

|       | M11        |            |                |            | B2-PLYP    |            |                |            | B-LYP      |            |                |            | PBE-PBE    |            |                |            | B3-LYP     |            |                |            |
|-------|------------|------------|----------------|------------|------------|------------|----------------|------------|------------|------------|----------------|------------|------------|------------|----------------|------------|------------|------------|----------------|------------|
|       | $\Delta G$ | $\Delta H$ | $\Delta E+ZPE$ | $\Delta E$ | $\Delta G$ | $\Delta H$ | $\Delta E+ZPE$ | $\Delta E$ | $\Delta G$ | $\Delta H$ | $\Delta E+ZPE$ | $\Delta E$ | $\Delta G$ | $\Delta H$ | $\Delta E+ZPE$ | $\Delta E$ | $\Delta G$ | $\Delta H$ | $\Delta E+ZPE$ | $\Delta E$ |
| F     | -0.32      | -0.41      | -0.38          | -0.47      | 0.25       | 0.21       | 0.23           | 0.19       | 0.30       | 0.28       | 0.28           | 0.29       | 0.39       | 0.36       | 0.37           | 0.34       | 0.30       | 0.28       | 0.29           | 0.27       |
| Cl    | -0.13      | -0.35      | -0.27          | -0.43      | 0.80       | 0.66       | 0.71           | 0.64       | 0.98       | 0.87       | 0.92           | 0.89       | 0.82       | 0.69       | 0.74           | 0.69       | 0.96       | 0.84       | 0.89           | 0.84       |
| Br    | -0.23      | -0.48      | -0.39          | -0.53      | 0.87       | 0.70       | 0.77           | 0.71       | 1.10       | 0.97       | 1.02           | 1.03       | 0.83       | 0.67       | 0.73           | 0.71       | 1.04       | 0.91       | 0.96           | 0.94       |
| I     | -0.17      | -0.45      | -0.35          | -0.50      | 0.98       | 0.79       | 0.86           | 0.82       | 1.25       | 1.11       | 1.17           | 1.19       | 0.84       | 0.65       | 0.73           | 0.73       | 1.19       | 1.03       | 1.10           | 1.09       |
| CCH   | -0.13      | -0.33      | -0.26          | -0.41      | 0.75       | 0.63       | 0.68           | 0.58       | 1.14       | 1.06       | 1.09           | 1.02       | 0.88       | 0.78       | 0.81           | 0.72       | 1.08       | 0.98       | 1.02           | 0.92       |
| CN    | -0.40      | -0.59      | -0.52          | -0.67      | 0.41       | 0.31       | 0.35           | 0.27       | 0.78       | 0.71       | 0.74           | 0.67       | 0.53       | 0.44       | 0.47           | 0.40       | 0.70       | 0.62       | 0.65           | 0.58       |
| Me    | 1.50       | 1.36       | 1.42           | 1.12       | 2.34       | 2.24       | 2.27           | 2.06       | 2.53       | 2.46       | 2.49           | 2.31       | 2.44       | 2.34       | 2.38           | 2.17       | 2.52       | 2.44       | 2.47           | 2.27       |
| Et-A  | 1.50       | 1.12       | 1.27           | 0.86       | 2.23       | 2.15       | 2.21           | 1.99       | 2.47       | 2.42       | 2.46           | 2.28       | 2.33       | 2.26       | 2.31           | 2.10       | 2.47       | 2.41       | 2.45           | 2.25       |
| Et-B  | 1.07       | 0.51       | 0.64           | 0.36       | 1.08       | 1.07       | 1.10           | 1.01       | 1.19       | 1.21       | 1.23           | 1.17       | 1.11       | 1.12       | 1.15           | 1.08       | 1.20       | 1.22       | 1.24           | 1.16       |
| iPr-A | 1.14       | 0.81       | 0.98           | 0.53       | 2.13       | 2.01       | 2.10           | 1.84       | 2.54       | 2.43       | 2.51           | 2.31       | 2.29       | 2.19       | 2.27           | 2.04       | 2.50       | 2.39       | 2.48           | 2.24       |
| iPr-B | 0.88       | 1.03       | 1.10           | 0.83       | 1.89       | 1.94       | 2.02           | 1.80       | 2.28       | 2.37       | 2.43           | 2.27       | 1.96       | 2.07       | 2.14           | 1.96       | 2.24       | 2.32       | 2.39           | 2.19       |
| tBu   | 5.50       | 4.73       | 4.99           | 4.28       | 6.00       | 5.45       | 5.61           | 5.25       | 4.95       | 5.36       | 5.41           | 5.22       | 5.64       | 5.32       | 5.44           | 5.15       | 5.73       | 5.60       | 5.69           | 5.41       |
| Ph-B  | 2.47       | 1.99       | 2.18           | 1.69       | 4.01       | 3.59       | 3.72           | 3.42       | 4.53       | 4.18       | 4.28           | 4.04       | 4.01       | 3.59       | 3.71           | 3.45       | 4.47       | 4.07       | 4.19           | 3.90       |
| Ph-C  | 2.47       | 1.99       | 2.18           | 1.83       | 4.38       | 4.57       | 4.62           | 4.32       | 4.46       | 4.61       | 4.65           | 4.41       | 4.32       | 4.50       | 4.56           | 4.28       | 4.62       | 4.75       | 4.80           | 4.52       |
| Ph-D  | 2.47       | 1.99       | 2.18           | 1.73       | 4.01       | 3.59       | 3.72           | 3.42       | 4.53       | 4.18       | 4.28           | 4.04       | 4.01       | 3.59       | 3.71           | 3.45       | 4.47       | 4.07       | 4.19           | 3.91       |
| CF3   | 2.25       | 2.11       | 2.18           | 1.93       | 2.68       | 2.53       | 2.58           | 2.42       | 2.66       | 2.55       | 2.59           | 2.47       | 2.64       | 2.51       | 2.56           | 2.41       | 2.75       | 2.63       | 2.68           | 2.53       |
| CCl3  | 4.82       | 4.87       | 4.88           | 4.78       | 5.16       | 5.09       | 5.12           | 5.00       | 4.98       | 4.91       | 4.93           | 4.86       | 4.97       | 4.90       | 4.92           | 4.82       | 5.22       | 5.15       | 5.18           | 5.07       |
| CBr3  | 5.59       | 5.68       | 5.68           | 5.60       | 5.87       | 5.83       | 5.85           | 5.76       | 5.65       | 5.62       | 5.62           | 5.58       | 5.61       | 5.58       | 5.58           | 5.52       | 5.93       | 5.89       | 5.90           | 5.83       |
| Cl3   | 6.68       | 6.79       | 6.76           | 6.71       | 6.83       | 6.86       | 6.85           | 6.80       | 6.58       | 6.59       | 6.58           | 6.57       | 6.53       | 6.53       | 6.52           | 6.49       | 6.91       | 6.92       | 6.91           | 6.87       |
| SiMe3 | 3.08       | 1.84       | 2.16           | 1.59       | 2.47       | 2.90       | 3.00           | 2.76       | 3.33       | 3.16       | 3.26           | 3.07       | 2.81       | 2.80       | 2.91           | 2.72       | 3.23       | 3.17       | 3.27           | 3.04       |

|       | PBE-QIDH-D3BJ |            |                |            | M06L-D3    |            |                |            | rev-M06L   |            |                |            | rev-M06    |            |                |            | B97-MV     |            |                |            |
|-------|---------------|------------|----------------|------------|------------|------------|----------------|------------|------------|------------|----------------|------------|------------|------------|----------------|------------|------------|------------|----------------|------------|
|       | $\Delta G$    | $\Delta H$ | $\Delta E+ZPE$ | $\Delta E$ | $\Delta G$ | $\Delta H$ | $\Delta E+ZPE$ | $\Delta E$ | $\Delta G$ | $\Delta H$ | $\Delta E+ZPE$ | $\Delta E$ | $\Delta G$ | $\Delta H$ | $\Delta E+ZPE$ | $\Delta E$ | $\Delta G$ | $\Delta H$ | $\Delta E+ZPE$ | $\Delta E$ |
| F     | 0.31          | 0.27       | 0.28           | 0.21       | -0.19      | -0.22      | -0.21          | -0.26      | 0.13       | 0.07       | 0.09           | 0.02       | 0.12       | 0.05       | 0.07           | -0.02      | 0.24       | 0.19       | 0.20           | 0.13       |
| Cl    | 0.56          | 0.39       | 0.45           | 0.35       | -0.24      | -0.41      | -0.34          | -0.40      | 0.56       | 0.39       | 0.45           | 0.34       | 0.43       | 0.22       | 0.29           | 0.16       | 0.47       | 0.29       | 0.36           | 0.24       |
| Br    | 0.49          | 0.29       | 0.37           | 0.28       | -0.19      | -0.39      | -0.32          | -0.36      | 0.64       | 0.46       | 0.53           | 0.44       | 0.44       | 0.21       | 0.30           | 0.17       | 0.48       | 0.27       | 0.35           | 0.25       |
| I     | 0.42          | 0.19       | 0.28           | 0.20       | -0.11      | -0.36      | -0.27          | -0.33      | 0.85       | 0.66       | 0.73           | 0.67       | 0.50       | 0.25       | 0.35           | 0.25       | 0.55       | 0.33       | 0.41           | 0.34       |
| CCH   | 0.36          | 0.22       | 0.27           | 0.15       | 0.04       | -0.08      | -0.04          | -0.10      | 0.62       | 0.45       | 0.51           | 0.34       | 0.31       | 0.13       | 0.19           | 0.03       | 0.53       | 0.38       | 0.43           | 0.27       |
| CN    | 0.06          | -0.07      | -0.02          | -0.11      | -0.16      | -0.24      | -0.21          | -0.24      | 0.21       | 0.07       | 0.12           | -0.01      | -0.05      | -0.22      | -0.16          | -0.29      | 0.18       | 0.04       | 0.09           | -0.04      |
| Me    | 2.15          | 2.03       | 2.08           | 1.84       | 1.62       | 1.45       | 1.52           | 1.27       | 2.35       | 2.24       | 2.28           | 2.00       | 2.08       | 1.94       | 2.00           | 1.70       | 2.36       | 2.22       | 2.27           | 1.98       |
| Et-A  | 1.99          | 1.87       | 1.95           | 1.69       | 1.37       | 1.18       | 1.26           | 1.04       | 2.27       | 2.16       | 2.24           | 1.88       | 2.00       | 1.80       | 1.90           | 1.52       | 2.14       | 2.06       | 2.13           | 1.82       |
| Et-B  | 0.99          | 0.92       | 0.96           | 0.83       | 0.88       | 0.59       | 0.67           | 0.52       | 1.28       | 1.15       | 1.21           | 1.01       | 1.15       | 0.92       | 1.00           | 0.77       | 1.06       | 1.03       | 1.07           | 0.92       |
| iPr-A | 1.71          | 1.60       | 1.70           | 1.41       | 1.31       | 0.90       | 1.03           | 0.78       | 1.85       | 1.83       | 1.96           | 1.56       | 1.52       | 1.47       | 1.60           | 1.20       | 1.65       | 1.76       | 1.86           | 1.51       |
| iPr-B | 1.51          | 1.56       | 1.65           | 1.42       | 1.48       | 1.18       | 1.30           | 1.02       | 1.70       | 2.09       | 2.14           | 1.87       | 1.29       | 1.62       | 1.68           | 1.41       | 1.36       | 1.80       | 1.85           | 1.62       |
| tBu   | 6.35          | 5.32       | 5.55           | 5.08       | 5.61       | 4.57       | 4.80           | 4.41       | 6.66       | 5.79       | 6.04           | 5.47       | 6.13       | 5.34       | 5.58           | 5.04       | 6.42       | 5.36       | 5.60           | 5.11       |
| Ph-B  | 3.33          | 2.87       | 3.02           | 2.67       | 2.64       | 2.08       | 2.26           | 1.84       | 3.90       | 3.55       | 3.68           | 3.30       | 3.42       | 2.98       | 3.14           | 2.70       | 3.64       | 3.21       | 3.35           | 2.95       |
| Ph-C  | 4.03          | 4.46       | 4.50           | 4.18       | 3.56       | 4.03       | 4.10           | 3.70       | 3.90       | 3.55       | 3.68           | 3.30       | 3.42       | 2.98       | 3.14           | 2.70       | 4.19       | 4.74       | 4.78           | 4.42       |
| Ph-D  | 3.33          | 2.87       | 3.02           | 2.67       | 2.64       | 2.08       | 2.26           | 1.84       | 3.90       | 3.55       | 3.68           | 3.30       | 3.42       | 2.98       | 3.14           | 2.70       | 3.64       | 3.20       | 3.35           | 2.95       |
| CF3   | 2.73          | 2.56       | 2.63           | 2.44       | 2.31       | 2.12       | 2.20           | 1.94       | 2.63       | 2.55       | 2.59           | 2.42       | 2.65       | 2.52       | 2.58           | 2.36       | 2.57       | 2.40       | 2.47           | 2.25       |
| CCl3  | 5.17          | 5.11       | 5.14           | 5.00       | 4.69       | 4.57       | 4.62           | 4.39       | 5.67       | 5.73       | 5.72           | 5.64       | 5.42       | 5.44       | 5.45           | 5.33       | 5.22       | 5.17       | 5.20           | 5.07       |
| CBr3  | 5.83          | 5.81       | 5.82           | 5.70       | 5.11       | 5.20       | 5.18           | 5.23       | 6.54       | 6.63       | 6.61           | 6.57       | 6.20       | 6.27       | 6.26           | 6.19       | 5.95       | 5.96       | 5.96           | 5.88       |
| Cl3   | 6.74          | 6.79       | 6.78           | 6.70       | 6.21       | 6.37       | 6.33           | 6.38       | 7.70       | 7.88       | 7.82           | 7.84       | 7.24       | 7.39       | 7.36           | 7.33       | 7.02       | 7.09       | 7.07           | 7.02       |
| SiMe3 | 3.04          | 2.46       | 2.64           | 2.30       | 3.39       | 1.79       | 2.13           | 1.58       | 4.01       | 2.70       | 2.98           | 2.49       | 3.91       | 2.33       | 2.64           | 2.11       | 2.96       | 2.35       | 2.54           | 2.18       |

|       | $\omega$ B97M-V |            |                |            | $\omega$ B97X-V |            |                |            | VV10       |            |                |            | BLYP-D3    |            |                |            | CAM-B3LYP  |            |                |            |
|-------|-----------------|------------|----------------|------------|-----------------|------------|----------------|------------|------------|------------|----------------|------------|------------|------------|----------------|------------|------------|------------|----------------|------------|
|       | $\Delta G$      | $\Delta H$ | $\Delta E+ZPE$ | $\Delta E$ | $\Delta G$      | $\Delta H$ | $\Delta E+ZPE$ | $\Delta E$ | $\Delta G$ | $\Delta H$ | $\Delta E+ZPE$ | $\Delta E$ | $\Delta G$ | $\Delta H$ | $\Delta E+ZPE$ | $\Delta E$ | $\Delta G$ | $\Delta H$ | $\Delta E+ZPE$ | $\Delta E$ |
| F     | 0.11            | 0.06       | 0.08           | 0.02       | 0.06            | 0.02       | 0.03           | -0.01      | 0.09       | 0.04       | 0.06           | 0.03       | 0.19       | 0.15       | 0.16           | 0.17       | 0.20       | 0.18       | 0.19           | 0.16       |
| Cl    | 0.39            | 0.22       | 0.29           | 0.18       | 0.45            | 0.29       | 0.35           | 0.25       | 0.35       | 0.19       | 0.25           | 0.19       | 0.41       | 0.24       | 0.30           | 0.26       | 0.88       | 0.75       | 0.80           | 0.72       |
| Br    | 0.37            | 0.17       | 0.25           | 0.15       | 0.46            | 0.28       | 0.35           | 0.26       | 0.31       | 0.13       | 0.20           | 0.17       | 0.35       | 0.15       | 0.22           | 0.21       | 0.97       | 0.82       | 0.88           | 0.82       |
| I     | 0.39            | 0.16       | 0.25           | 0.16       | 0.52            | 0.31       | 0.39           | 0.31       | 0.26       | 0.06       | 0.13           | 0.13       | 0.39       | 0.17       | 0.25           | 0.26       | 1.13       | 0.96       | 1.03           | 0.98       |
| CCH   | 0.33            | 0.18       | 0.23           | 0.11       | 0.39            | 0.23       | 0.28           | 0.15       | 0.34       | 0.29       | 0.32           | 0.24       | 0.70       | 0.60       | 0.63           | 0.56       | 0.96       | 0.85       | 0.89           | 0.78       |
| CN    | 0.00            | -0.14      | -0.09          | -0.19      | 0.03            | -0.10      | -0.05          | -0.15      | 0.12       | 0.01       | 0.05           | -0.03      | 0.37       | 0.28       | 0.31           | 0.25       | 0.57       | 0.48       | 0.51           | 0.43       |
| Me    | 2.04            | 1.92       | 1.97           | 1.73       | 2.03            | 1.92       | 1.96           | 1.73       | 2.02       | 1.90       | 1.94           | 1.72       | 2.09       | 1.99       | 2.02           | 1.83       | 2.46       | 2.36       | 2.40           | 2.19       |
| Et-A  | 1.90            | 1.77       | 1.85           | 1.57       | 1.89            | 1.79       | 1.86           | 1.60       | 1.83       | 1.73       | 1.80           | 1.57       | 1.90       | 1.83       | 1.88           | 1.69       | 2.39       | 2.33       | 2.38           | 2.15       |
| Et-B  | 0.96            | 0.86       | 0.92           | 0.77       | 0.96            | 0.89       | 0.94           | 0.80       | 0.88       | 0.86       | 0.89           | 0.80       | 0.93       | 0.93       | 0.96           | 0.89       | 1.17       | 1.17       | 1.19           | 1.10       |
| iPr-A | 1.66            | 1.50       | 1.61           | 1.28       | 1.66            | 1.54       | 1.65           | 1.34       | 1.63       | 1.50       | 1.60           | 1.35       | 1.67       | 1.58       | 1.67           | 1.44       | 2.36       | 2.27       | 2.36           | 2.08       |
| iPr-B | 1.50            | 1.51       | 1.60           | 1.33       | 1.54            | 1.59       | 1.67           | 1.43       | 1.46       | 1.54       | 1.61           | 1.42       | 1.61       | 1.73       | 1.79           | 1.63       | 2.06       | 2.15       | 2.22           | 2.00       |
| tBu   | 6.25            | 5.04       | 5.30           | 4.78       | 6.07            | 5.09       | 5.32           | 4.84       | 5.02       | 4.61       | 4.75           | 4.42       | 5.08       | 4.65       | 4.78           | 4.53       | 6.18       | 5.66       | 5.81           | 5.44       |
| Ph-B  | 3.30            | 2.82       | 2.97           | 2.59       | 3.41            | 2.94       | 3.09           | 2.71       | 3.26       | 2.82       | 2.96           | 2.65       | 3.55       | 3.28       | 3.38           | 3.14       | 4.23       | 3.81       | 3.93           | 3.61       |
| Ph-C  | 4.03            | 4.38       | 4.42           | 4.09       | 4.04            | 4.35       | 4.39           | 4.07       | 3.60       | 3.78       | 3.84           | 3.55       | 2.99       | 3.81       | 3.82           | 3.66       | 4.62       | 4.83       | 4.88           | 4.56       |
| Ph-D  | 3.30            | 2.82       | 2.97           | 2.59       | 3.41            | 2.94       | 3.08           | 2.71       | 3.26       | 2.82       | 2.96           | 2.65       | 3.55       | 3.28       | 3.38           | 3.14       | 4.23       | 3.81       | 3.93           | 3.61       |
| CF3   | 2.34            | 2.20       | 2.26           | 2.09       | 2.38            | 2.21       | 2.27           | 2.08       | 2.11       | 1.92       | 1.99           | 1.81       | 2.16       | 1.95       | 2.02           | 1.86       | 2.70       | 2.56       | 2.61           | 2.45       |
| CCl3  | 4.84            | 4.80       | 4.83           | 4.68       | 4.84            | 4.79       | 4.83           | 4.68       | 4.31       | 4.19       | 4.23           | 4.10       | 4.22       | 4.13       | 4.16           | 4.10       | 5.32       | 5.26       | 5.29           | 5.16       |
| CBr3  | 5.55            | 5.55       | 5.56           | 5.45       | 5.57            | 5.55       | 5.57           | 5.45       | 4.90       | 4.84       | 4.86           | 4.78       | 4.79       | 4.75       | 4.76           | 4.75       | 6.08       | 6.05       | 6.07           | 5.96       |
| Cl3   | 6.55            | 6.60       | 6.59           | 6.49       | 6.56            | 6.60       | 6.59           | 6.50       | 5.80       | 5.78       | 5.78           | 5.74       | 5.64       | 5.68       | 5.66           | 5.72       | 7.11       | 7.14       | 7.13           | 7.07       |
| SiMe3 | 3.04            | 2.27       | 2.48           | 2.11       | 3.07            | 2.38       | 2.58           | 2.20       | 1.47       | 2.00       | 2.11           | 1.90       | 2.35       | 2.22       | 2.34           | 2.10       | 2.69       | 3.11       | 3.21           | 2.95       |

|       | APF-D      |            |                |            | APF        |            |                |            | PBE0       |            |                |            | TPSS       |            |                |            | TPSS-D3BJ  |            |                |            |
|-------|------------|------------|----------------|------------|------------|------------|----------------|------------|------------|------------|----------------|------------|------------|------------|----------------|------------|------------|------------|----------------|------------|
|       | $\Delta G$ | $\Delta H$ | $\Delta E+ZPE$ | $\Delta E$ | $\Delta G$ | $\Delta H$ | $\Delta E+ZPE$ | $\Delta E$ | $\Delta G$ | $\Delta H$ | $\Delta E+ZPE$ | $\Delta E$ | $\Delta G$ | $\Delta H$ | $\Delta E+ZPE$ | $\Delta E$ | $\Delta G$ | $\Delta H$ | $\Delta E+ZPE$ | $\Delta E$ |
| F     | 0.11       | 0.07       | 0.08           | 0.03       | 0.40       | 0.38       | 0.39           | 0.34       | 0.39       | 0.37       | 0.38           | 0.33       | 0.33       | 0.29       | 0.31           | 0.27       | 0.29       | 0.24       | 0.26           | 0.23       |
| Cl    | 0.28       | 0.21       | 0.22           | 0.26       | 0.87       | 0.74       | 0.79           | 0.72       | 0.83       | 0.70       | 0.75           | 0.67       | 0.80       | 0.65       | 0.71           | 0.67       | 0.35       | 0.17       | 0.23           | 0.18       |
| Br    | 0.19       | -0.02      | 0.06           | -0.02      | 0.88       | 0.72       | 0.78           | 0.73       | 0.84       | 0.67       | 0.74           | 0.68       | 0.84       | 0.66       | 0.73           | 0.71       | 0.28       | 0.06       | 0.14           | 0.10       |
| I     | 0.31       | 0.05       | 0.16           | -0.02      | 0.91       | 0.73       | 0.80           | 0.78       | 0.86       | 0.67       | 0.75           | 0.71       | 0.90       | 0.68       | 0.77           | 0.77       | 0.15       | -0.10      | -0.01          | -0.01      |
| CCH   | 0.47       | 0.33       | 0.38           | 0.27       | 0.89       | 0.78       | 0.82           | 0.71       | 0.84       | 0.72       | 0.77           | 0.66       | 0.86       | 0.75       | 0.80           | 0.71       | 0.32       | 0.18       | 0.22           | 0.13       |
| CN    | 0.18       | 0.05       | 0.10           | 0.01       | 0.53       | 0.44       | 0.47           | 0.39       | 0.48       | 0.38       | 0.42           | 0.33       | 0.55       | 0.46       | 0.49           | 0.43       | 0.05       | -0.07      | -0.03          | -0.11      |
| Me    | 2.12       | 1.99       | 2.04           | 1.80       | 2.46       | 2.36       | 2.40           | 2.18       | 2.44       | 2.33       | 2.37           | 2.15       | 2.32       | 2.19       | 2.24           | 2.04       | 1.88       | 1.73       | 1.79           | 1.56       |
| Et-A  | 1.88       | 1.77       | 1.85           | 1.58       | 2.38       | 2.30       | 2.36           | 2.14       | 2.35       | 2.27       | 2.33           | 2.10       | 2.25       | 2.14       | 2.20           | 1.99       | 1.70       | 1.56       | 1.64           | 1.39       |
| Et-B  | 0.86       | 0.84       | 0.87           | 0.76       | 1.16       | 1.15       | 1.18           | 1.10       | 1.11       | 1.14       | 1.16           | 1.08       | 1.07       | 1.04       | 1.07           | 1.00       | 0.78       | 0.74       | 0.78           | 0.68       |
| iPr-A | 1.49       | 1.41       | 1.51           | 1.22       | 2.34       | 2.24       | 2.33           | 2.08       | 2.27       | 2.18       | 2.27           | 2.01       | 2.18       | 2.07       | 2.16           | 1.94       | 1.37       | 1.28       | 1.37           | 1.14       |
| iPr-B | 1.41       | 1.50       | 1.57           | 1.35       | 2.04       | 2.13       | 2.21           | 2.00       | 1.96       | 2.07       | 2.14           | 1.93       | 1.82       | 1.96       | 2.03           | 1.86       | 1.20       | 1.36       | 1.43           | 1.24       |
| tBu   | 5.56       | 4.87       | 5.06           | 4.66       | 6.12       | 5.65       | 5.79           | 5.46       | 6.12       | 5.60       | 5.75           | 5.40       | 5.78       | 5.35       | 5.49           | 5.20       | 5.21       | 4.61       | 4.79           | 4.44       |
| Ph-B  | 3.40       | 2.93       | 3.09           | 2.69       | 4.13       | 3.70       | 3.83           | 3.54       | 4.02       | 3.58       | 3.72           | 3.41       | 4.02       | 3.60       | 3.73           | 3.46       | 3.05       | 2.61       | 2.76           | 2.44       |
| Ph-C  | 3.62       | 4.01       | 4.04           | 3.83       | 4.59       | 4.79       | 4.84           | 4.55       | 4.54       | 4.75       | 4.80           | 4.50       | 4.46       | 4.54       | 4.60           | 4.32       | 3.63       | 3.78       | 3.84           | 3.52       |
| Ph-D  | 3.49       | 2.96       | 3.13           | 2.69       | 4.13       | 3.70       | 3.83           | 3.54       | 4.02       | 3.58       | 3.72           | 3.41       | 4.02       | 3.60       | 3.73           | 3.48       | 3.05       | 2.61       | 2.76           | 2.47       |
| CF3   | 2.29       | 2.11       | 2.18           | 1.96       | 2.87       | 2.74       | 2.80           | 2.63       | 2.81       | 2.67       | 2.73           | 2.56       | 2.73       | 2.58       | 2.63           | 2.47       | 2.38       | 2.20       | 2.27           | 2.10       |
| CCl3  | 4.83       | 4.66       | 4.74           | 4.52       | 5.32       | 5.27       | 5.29           | 5.17       | 5.30       | 5.24       | 5.26           | 5.14       | 5.09       | 5.03       | 5.06           | 4.96       | 4.45       | 4.37       | 4.40           | 4.28       |
| CBr3  | 5.24       | 5.20       | 5.22           | 5.14       | 6.02       | 5.99       | 6.00           | 5.91       | 6.00       | 5.97       | 5.98           | 5.88       | 5.78       | 5.74       | 5.75           | 5.69       | 5.07       | 5.01       | 5.03           | 4.94       |
| Cl3   | 6.21       | 6.24       | 6.24           | 6.22       | 6.98       | 7.00       | 6.99           | 6.94       | 6.96       | 6.98       | 6.98           | 6.92       | 6.75       | 6.75       | 6.74           | 6.70       | 5.94       | 5.94       | 5.94           | 5.88       |
| SiMe3 | 2.89       | 2.25       | 2.44           | 2.10       | 2.63       | 3.04       | 3.14           | 2.94       | 2.70       | 2.94       | 3.05           | 2.83       | 2.95       | 2.95       | 3.05           | 2.88       | 2.25       | 2.00       | 2.13           | 1.91       |

|       | BMK-D3BJ   |            |                |            | BMK        |            |                |            |
|-------|------------|------------|----------------|------------|------------|------------|----------------|------------|
|       | $\Delta G$ | $\Delta H$ | $\Delta E+ZPE$ | $\Delta E$ | $\Delta G$ | $\Delta H$ | $\Delta E+ZPE$ | $\Delta E$ |
| F     | 0.06       | 0.06       | 0.06           | 0.05       | 0.13       | 0.12       | 0.12           | 0.11       |
| Cl    | -0.05      | -0.21      | -0.15          | -0.22      | 0.60       | 0.40       | 0.48           | 0.35       |
| Br    | -0.19      | -0.35      | -0.29          | -0.32      | 0.76       | 0.52       | 0.62           | 0.48       |
| I     | -0.13      | -0.41      | -0.30          | -0.42      | 0.94       | 0.71       | 0.80           | 0.71       |
| CCH   | -0.04      | -0.21      | -0.15          | -0.29      | 0.50       | 0.37       | 0.41           | 0.31       |
| CN    | -0.36      | -0.49      | -0.44          | -0.52      | 0.18       | 0.06       | 0.10           | 0.03       |
| Me    | 1.64       | 1.53       | 1.58           | 1.31       | 1.89       | 1.90       | 1.90           | 1.76       |
| Et-A  | 1.37       | 1.28       | 1.33           | 1.12       | 2.38       | 2.03       | 2.18           | 1.70       |
| Et-B  | 0.53       | 0.58       | 0.57           | 0.56       | 1.81       | 1.29       | 1.50           | 0.88       |
| iPr-A | 1.14       | 1.13       | 1.24           | 0.79       | 2.27       | 2.08       | 2.25           | 1.55       |
| iPr-B | 1.78       | 1.55       | 1.75           | 1.05       | 1.92       | 2.06       | 2.18           | 1.63       |
| tBu   | 5.27       | 4.35       | 4.55           | 4.25       | 6.46       | 5.44       | 5.72           | 5.03       |
| Ph-B  | 2.89       | 2.30       | 2.48           | 2.05       | 4.14       | 3.37       | 3.58           | 3.00       |
| Ph-C  | 2.89       | 2.30       | 2.48           | 2.05       | 4.14       | 3.37       | 3.58           | 3.00       |
| Ph-D  | 2.89       | 2.30       | 2.47           | 2.05       | 4.14       | 3.37       | 3.58           | 3.00       |
| CF3   | 2.41       | 2.10       | 2.22           | 1.86       | 3.05       | 2.61       | 2.77           | 2.29       |
| CCl3  | 4.69       | 4.30       | 4.44           | 4.04       | 5.36       | 5.05       | 5.15           | 4.89       |
| CBr3  | 4.33       | 4.45       | 4.41           | 4.76       | 5.89       | 5.72       | 5.77           | 5.74       |
| Cl3   | 5.27       | 5.53       | 5.49           | 5.67       | 6.62       | 6.79       | 6.75           | 6.87       |
| SiMe3 | 3.13       | 1.71       | 2.06           | 1.38       | 4.29       | 2.92       | 3.29           | 2.56       |

|       | PBE0-DH    |            |                |            | MN15       |            |                |            | M06-L      |            |                |            |
|-------|------------|------------|----------------|------------|------------|------------|----------------|------------|------------|------------|----------------|------------|
|       | $\Delta G$ | $\Delta H$ | $\Delta E+ZPE$ | $\Delta E$ | $\Delta G$ | $\Delta H$ | $\Delta E+ZPE$ | $\Delta E$ | $\Delta G$ | $\Delta H$ | $\Delta E+ZPE$ | $\Delta E$ |
| F     | 0.36       | 0.33       | 0.34           | 0.28       | 0.15       | 0.06       | 0.09           | -0.03      | -0.18      | -0.21      | -0.20          | -0.25      |
| Cl    | 0.75       | 0.60       | 0.65           | 0.56       | 0.19       | -0.03      | 0.05           | -0.13      | -0.25      | -0.42      | -0.36          | -0.41      |
| Br    | 0.74       | 0.56       | 0.63           | 0.55       | 0.13       | -0.12      | -0.03          | -0.18      | -0.21      | -0.41      | -0.33          | -0.37      |
| I     | 0.76       | 0.55       | 0.63           | 0.57       | 0.08       | -0.18      | -0.08          | -0.21      | -0.13      | -0.38      | -0.29          | -0.35      |
| CCH   | 0.67       | 0.54       | 0.59           | 0.48       | 0.05       | -0.14      | -0.08          | -0.23      | 0.05       | -0.06      | -0.02          | -0.08      |
| CN    | 0.33       | 0.22       | 0.26           | 0.17       | -0.25      | -0.44      | -0.37          | -0.52      | -0.16      | -0.24      | -0.21          | -0.24      |
| Me    | 2.34       | 2.23       | 2.27           | 2.04       | 1.84       | 1.71       | 1.76           | 1.47       | 1.63       | 1.46       | 1.52           | 1.28       |
| Et-A  | 2.23       | 2.14       | 2.21           | 1.96       | 1.86       | 1.48       | 1.63           | 1.18       | 1.39       | 1.21       | 1.28           | 1.06       |
| Et-B  | 1.10       | 1.07       | 1.11           | 1.00       | 1.30       | 0.73       | 0.87           | 0.57       | 0.88       | 0.60       | 0.68           | 0.53       |
| iPr-A | 2.07       | 1.99       | 2.09           | 1.81       | 1.15       | 1.06       | 1.21           | 0.78       | 1.35       | 0.94       | 1.07           | 0.81       |
| iPr-B | 1.78       | 1.89       | 1.96           | 1.74       | 0.79       | 1.27       | 1.31           | 1.06       | 1.50       | 1.20       | 1.32           | 1.04       |
| tBu   | 6.39       | 5.60       | 5.80           | 5.39       | 5.57       | 4.90       | 5.12           | 4.50       | 5.68       | 4.60       | 4.85           | 4.45       |
| Ph-B  | 3.82       | 3.36       | 3.50           | 3.17       | 2.80       | 2.41       | 2.57           | 2.15       | 2.70       | 2.13       | 2.31           | 1.90       |
| Ph-C  | 4.47       | 4.75       | 4.80           | 4.49       | 2.80       | 2.41       | 2.57           | 4.45       | 3.62       | 4.09       | 4.15           | 3.75       |
| Ph-D  | 3.81       | 3.36       | 3.50           | 3.17       | 2.80       | 2.41       | 2.57           | 2.30       | 2.71       | 2.14       | 2.32           | 1.90       |
| CF3   | 2.85       | 2.69       | 2.75           | 2.57       | 2.64       | 2.52       | 2.58           | 2.35       | 2.35       | 2.16       | 2.24           | 1.98       |
| CCl3  | 5.39       | 5.33       | 5.36           | 5.22       | 5.16       | 5.21       | 5.22           | 5.09       | 4.71       | 4.58       | 4.64           | 4.40       |
| CBr3  | 6.10       | 6.07       | 6.09           | 5.98       | 5.90       | 5.98       | 5.97           | 5.87       | 5.12       | 5.21       | 5.19           | 5.23       |
| CI3   | 7.09       | 7.12       | 7.11           | 7.04       | 6.86       | 7.01       | 6.98           | 6.93       | 6.20       | 6.36       | 6.32           | 6.37       |
| SiMe3 | 3.24       | 2.86       | 3.01           | 2.73       | 3.08       | 1.88       | 2.19           | 1.65       | 3.41       | 1.86       | 2.19           | 1.65       |

**Table S9.** Differences in Gibbs free-energies ( $\Delta G$ ), Enthalpies ( $\Delta H$ ), Energies with zero-point energies ( $\Delta E+ZPE$ ) and Energies ( $\Delta E$ ) between the axial and equatorial Conformers, computed with the selected functionals and the DH-SVPD basis set.

|       | PBE-QIDH   |            |                |            | B2-PLYP    |            |                |            | mP2-PLYPD  |            |                |            | Ref.       |
|-------|------------|------------|----------------|------------|------------|------------|----------------|------------|------------|------------|----------------|------------|------------|
|       | $\Delta G$ | $\Delta H$ | $\Delta E+ZPE$ | $\Delta E$ | $\Delta G$ | $\Delta H$ | $\Delta E+ZPE$ | $\Delta E$ | $\Delta G$ | $\Delta H$ | $\Delta E+ZPE$ | $\Delta E$ | $\Delta G$ |
| F     | 0.13       | 0.11       | 0.12           | 0.07       | 0.13       | 0.11       | 0.12           | 0.08       | 0.03       | -0.01      | 0              | -0.04      | 0.208      |
| Cl    | 0.36       | 0.18       | 0.25           | 0.13       | 0.61       | 0.46       | 0.52           | 0.43       | 0.42       | 0.23       | 0.3            | 0.19       | 0.598      |
| Br    | 0.41       | 0.21       | 0.28           | 0.18       | 0.72       | 0.55       | 0.62           | 0.55       | 0.44       | 0.22       | 0.31           | 0.21       | 0.594      |
| I     | 0.47       | 0.25       | 0.34           | 0.27       | 0.84       | 0.65       | 0.73           | 0.69       | 0.47       | 0.22       | 0.32           | 0.24       | 0.365      |
| CCH   | 0.28       | 0.13       | 0.18           | 0.06       | 0.59       | 0.45       | 0.51           | 0.4        | 0.32       | 0.17       | 0.22           | 0.09       | 0.476      |
| CN    | -0.03      | -0.14      | -0.1           | -0.2       | 0.25       | 0.14       | 0.18           | 0.09       | -0.02      | -0.16      | -0.11          | -0.21      | 0.142      |
| Me    | 1.95       | 1.83       | 1.87           | 1.69       | 2.07       | 1.96       | 2              | 1.83       | 1.73       | 1.58       | 1.64           | 1.43       | 2.057      |
| Et-A  | 1.84       | 1.7        | 1.78           | 1.56       | 1.99       | 1.87       | 1.93           | 1.74       | 1.6        | 1.42       | 1.51           | 1.25       | 1.954      |
| Et-B  | 0.98       | 0.81       | 0.87           | 0.74       | 1.03       | 0.9        | 0.95           | 0.84       | 0.84       | 0.65       | 0.73           | 0.55       | 0.992      |
| iPr-A | 1.67       | 1.5        | 1.61           | 1.34       | 1.92       | 1.75       | 1.86           | 1.6        | 1.4        | 1.18       | 1.3            | 0.97       | 1.728      |
| iPr-B | 1.56       | 1.47       | 1.57           | 1.36       | 1.78       | 1.71       | 1.81           | 1.61       | 1.4        | 1.28       | 1.4            | 1.09       | 1.487      |
| tBu   | 6.21       | 5.28       | 5.5            | 5.08       | 5.82       | 5.18       | 5.36           | 5          | 5.55       | 4.75       | 4.97           | 4.49       | 6.803      |
| Ph-B  | 3.26       | 2.85       | 2.99           | 2.68       | 3.71       | 3.33       | 3.46           | 3.17       | 3.17       | 2.62       | 2.8            | 2.36       | 3.275      |
| Ph-C  | 3.7        | 4.36       | 4.4            | 4.11       | 3.92       | 4.31       | 4.35           | 4.09       | 3.9        | 3.91       | 3.99           | 3.57       | 3.539      |
| Ph-D  | 3.27       | 2.85       | 2.99           | 2.68       | 3.71       | 3.33       | 3.46           | 3.17       | 3.17       | 2.62       | 2.8            | 2.36       | 4.631      |
| CF3   | 2.62       | 2.44       | 2.5            | 2.3        | 2.55       | 2.38       | 2.44           | 2.28       | 2.23       | 1.99       | 2.08           | 1.83       | 2.512      |
| CCl3  | 4.89       | 4.79       | 4.84           | 4.67       | 4.82       | 4.7        | 4.75           | 4.6        | 4.57       | 4.44       | 4.49           | 4.31       | 4.912      |
| CBr3  | 5.69       | 5.67       | 5.69           | 5.57       | 5.59       | 5.55       | 5.57           | 5.47       | 5.31       | 5.26       | 5.29           | 5.16       | 5.547      |
| CI3   | 6.79       | 6.84       | 6.83           | 6.77       | 6.65       | 6.67       | 6.67           | 6.63       | 6.35       | 6.38       | 6.38           | 6.32       | 6.233      |
| SiMe3 | 2.96       | 2.31       | 2.51           | 2.18       | 2.67       | 2.45       | 2.6            | 2.33       | 2.24       | 1.83       | 2.02           | 1.65       | 3.272      |



**Table S10.** Gibbs Free-Energy differences (kcal/mol) between the axial and equatorial conformers, computed using the selected functionals and the 6-31G\*-ACP model.

|       | B3LYP | CAM-B3LYP | M06-2X |
|-------|-------|-----------|--------|
| F     | 0.735 | 0.195     | 0.288  |
| Cl    | 0.984 | 0.729     | 0.645  |
| Br    | -     | -         | -      |
| I     | -     | -         | -      |
| CCH   | 0.082 | 0.001     | -0.189 |
| CN    | 0.052 | -0.123    | -0.346 |
| Me    | 2.322 | 2.21      | 1.98   |
| Et-A  | 2.191 | 2.107     | 1.918  |
| Et-B  | 1.295 | 1.169     | 1.168  |
| iPr-A | 1.865 | 1.866     | 1.748  |
| iPr-B | 1.544 | 1.825     | 1.847  |
| tBu   | 5.817 | 5.239     | 4.712  |
| Ph-B  | 3.371 | 3.571     | 3.311  |
| Ph-C  | 5.987 | 5.796     | 4.197  |
| Ph-D  | 4.713 | 5.028     | 4.704  |
| CF3   | 3.271 | 2.482     | 2.508  |
| CCl3  | 5.777 | 4.975     | 4.925  |
| CBr3  | -     | -         | -      |
| Cl3   | -     | -         | -      |
| SiMe3 | 3.165 | 4.243     | 2.492  |
